# Supplementary material
Source: Springer Nature journal article supplement (https://www.springermedizin.de/resource/supplementary/12936_2014_3243_MOESM3_ESM.pdf/9545450)

**(QHS)**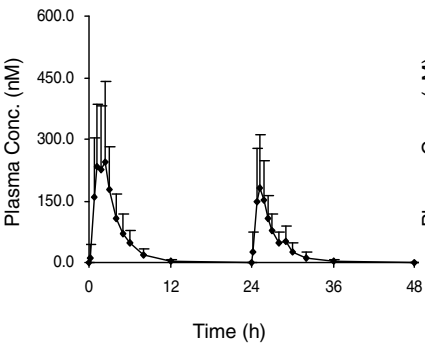**(Deoxy-QHS)**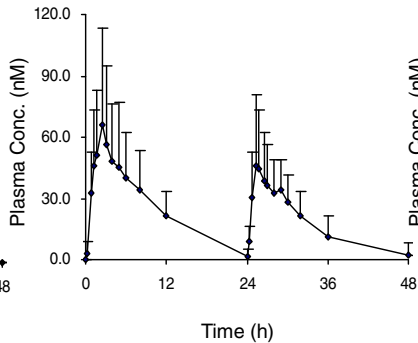**(Monohydroxylated deoxy-QHS, M1)**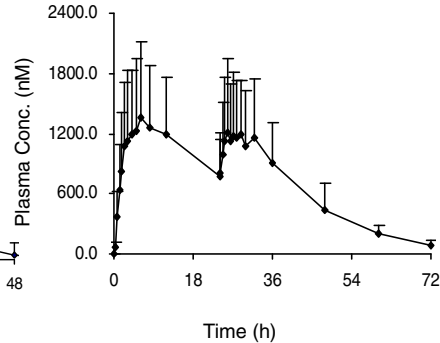**(Monohydroxylated QHS, M2)**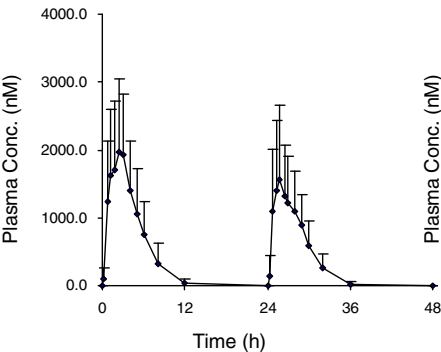**(Dihydroxylated QHS, M3)**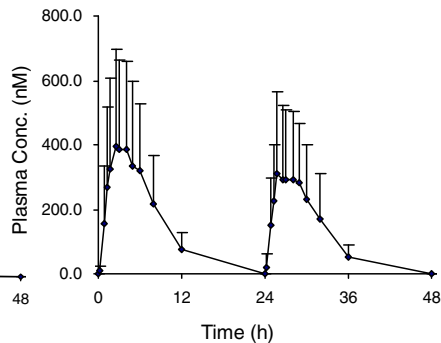

Supplement: MOESM3 [file 9545450]
